# Supplementary material
Source: PubMed Central journal article supplement (PMC2725234)

The American Journal of Human Genetics, Volume 85

## **Supplemental Data**

### **Molecular Basis of DFNB73: Mutations of *BSND***

### **Can Cause Nonsyndromic Deafness or Bartter Syndrome**

Saima Riazuddin, Saima Anwar, Martin Fischer, Zubair M. Ahmed, Shahid Y. Khan, Audrey G. H. Janssen, Ahmad Usman Zafar, Ute Scholl, Tayyab Husnain, Inna A. Belyantseva, Penelope L. Friedman, Sheikh Riazuddin, Thomas B. Friedman, and Christoph Fahlke

**Table S1. Clinical and biochemical features of carriers and p.I12T homozygotes**

| Feature                             | Reference ranges | Family (individual) |             |             |             |             |              |              |               |              |
|-------------------------------------|------------------|---------------------|-------------|-------------|-------------|-------------|--------------|--------------|---------------|--------------|
|                                     |                  | DF067 (IV:1)        | DF067 (V:2) | DF067 (V:5) | DF393 (V:2) | DF393 (V:8) | DF393 (V:3)  | DF815 (V:12) | DF815 (VI:10) | DF815 (VI:8) |
| genotypes                           |                  | T <sup>a</sup> /T   | T/T         | T/+         | T/T         | T/T         | T/+          | T/T          | T/T           | T/+          |
| present age (y)                     |                  | 45                  | 16          | 21          | 20          | 14          | 12           | 42           | 16            | 8            |
| hearing loss                        |                  | deaf                | deaf        | normal      | deaf        | deaf        | normal       | deaf         | deaf          | normal       |
| Other Symptoms of BSIV <sup>b</sup> |                  | no                  | no          | no          | no          | no          | no           | no           | no            | no           |
| S <sup>c</sup> Na (mmol/L)          | 136-148          | 143                 | 142         | 140         | 139         | 143         | 141          | 141          | 141           | 140          |
| S K (mmol/L)                        | 3.6-5.0          | 3.49                | 3.83        | 3.98        | 4.12        | 3.69        | 4.36         | 4.02         | 4.14          | 4.7          |
| S Cl (mmol/L)                       | 95-108           | 104                 | 103         | 101         | 101         | 104         | 102          | 102          | 103           | 104          |
| S HCO <sub>3</sub> (mmol/ L)        | 22-29            | 25                  | 24.3        | 27.2        | NA          | NA          | 27.2         | 28.1         | 25.6          | 22.5         |
| S Mg (mg/dl)                        | 1.9-2.5          | NA <sup>f</sup>     | NA          | NA          | 2.35        | 2.22        | 2.4          | NA           | NA            | NA           |
| S Ca (mg/dl)                        | 8.6-10.5         | 9.29                | 9.09        | 9.41        | 9.85        | 9.37        | 9.69         | NA           | NA            | NA           |
| S Creatinine (mg/dl)                | 0.7-1.2          | 0.6                 | 0.67        | 0.77        | 0.82        | 0.75        | 1.28         | 1.06         | 0.93          | 0.54         |
| P <sup>d</sup> Renin (ng/ml/hr)     | 0.15-2.33        | 4.5                 | 11.05       | 8.7         | 20.3        | 7.0         | 3.75         | NA           | NA            | NA           |
| S Aldosterone (ng/dl)               | 4-31             | 9.3                 | 12.8        | 41.5        | 13.4        | 14.0        | 22.6         | NA           | NA            | NA           |
| S Osmolality (mosm/Kg)              | 273-304          | NA                  | NA          | NA          | 304         | 324         | 332          | NA           | NA            | NA           |
| U <sup>e</sup> Na (mmol/ L)         | 30-150           | 9.0                 | 58          | NA          | 63          | 95          | 83           | 115.5        | 68            | 103          |
| U K (mmol/ L)                       | 20-67            | NA                  | NA          | NA          | NA          | NA          | NA           | NA           | NA            | NA           |
| U Cl (mmol/ L)                      | 46-168           | NA                  | NA          | NA          | 57          | 102         | 137          | NA           | NA            | NA           |
| U Mg (mg/dl)                        |                  | NA                  | NA          | NA          | 6.64        | 11.14       |              | NA           | NA            | NA           |
| U Ca (mg/dl)                        |                  |                     |             |             | 13.9        | 2.96        | 5.49         |              | 50.32         | 55.42        |
| (mg/24hrs)                          | 100-320          | 32.0                | 29.20       | NA          |             |             |              | 56.35        |               |              |
| U osmolality (mosm/Kg)              | 50-1400          | NA                  | NA          | NA          | 290         | 314         | 657          | NA           | NA            | NA           |
| nephrocalcinosis                    |                  | NA                  | NA          | NA          | absent      | absent      | <sup>g</sup> | NA           | NA            | NA           |

<sup>a</sup>p.I12T, <sup>b</sup>Other Symptoms of BSIV (polyhydramnion, premature birth, low birth weight, failure to thrive, polyuria, polydypsia, nocturnal enuresis), <sup>c</sup>Serum (S),

<sup>d</sup>Plasma (P), <sup>e</sup>Urinary (U) values were determined from spot samples, <sup>f</sup>Not available (NA). <sup>g</sup>Left renal stone with hydronephrosis

**Figure S1. Representative pure-tone audiograms of affected members of family PKDF815** Pure-tone response thresholds are shown for p.I12T homozygotes (A) or for a p.I12T/E4X compound heterozygote (B). Filled and open circles represent the right and left ears, respectively. The carriers of mutant alleles have normal hearing.

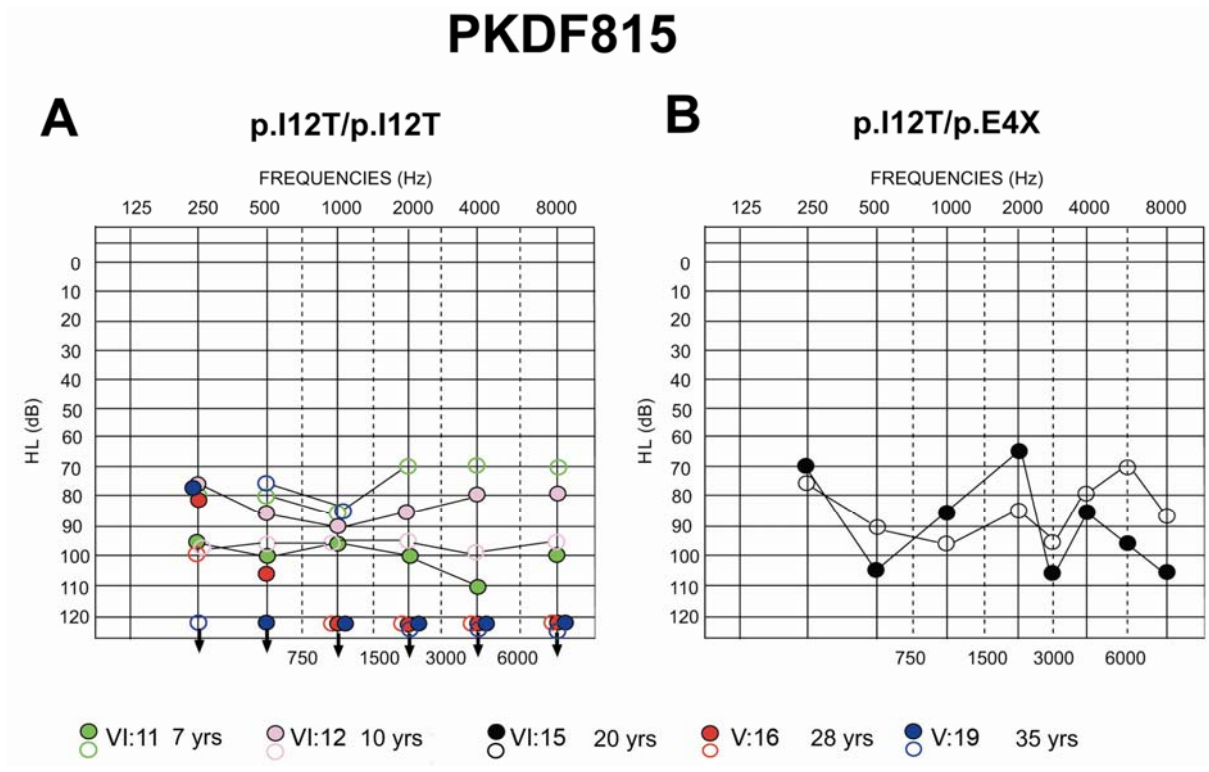

**Figure S2. p.I12T reduces ClC-K/barttin current amplitudes also at low [Cl<sup>-</sup>]** Mean current amplitudes  $\pm$  SEM, n = 8–10, of ClC-Ka/barttin channels for wild-type and p.I12T barttin at low chloride concentrations (30/30 mM Cl<sub>ext</sub>/Cl<sub>int</sub>).

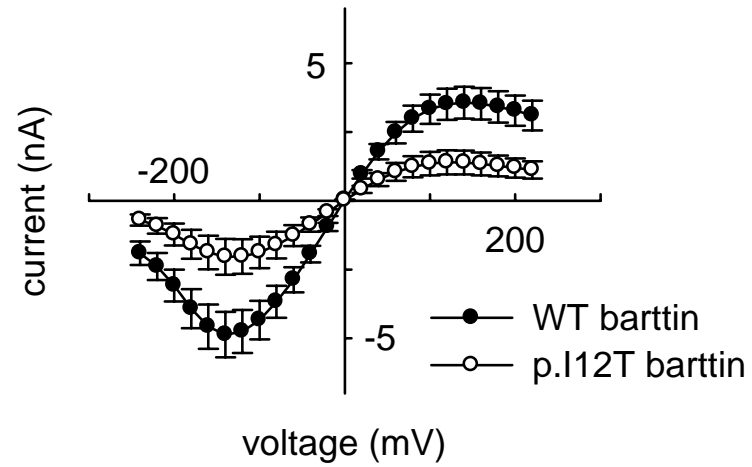

**Figure S3. Noise analysis of ClC-Ka/barttin for WT and p.I12T barttin**

(A) Representative whole-cell recording from ClC-Ka/WT barttin channels used for stationary noise analysis. (B) Plot of the variance, normalized by the product of the mean current ( $I$ ) and the electrical driving force ( $V-V_r$ ), versus the macroscopic conductance  $I/(V-V_r)$  from the cell shown in (A) after filtering with 2 or 10 kHz. Solid lines give linear fits to the data. (C,D) Representative stationary noise analyses for WT or p.I12T barttin at 150/124mM  $Cl_{ext}/Cl_{int}$  (C) or at 30/30mM  $Cl_{ext}/Cl_{int}$  (D). (E,F) Mean unitary current conductances (E) and voltage dependences of the absolute open probability (F) of ClC-Ka/barttin channels for WT and p.I12T barttin obtained for high and low chloride concentrations. Data points represent mean values  $\pm$  SEM,  $n = 7-12$ .

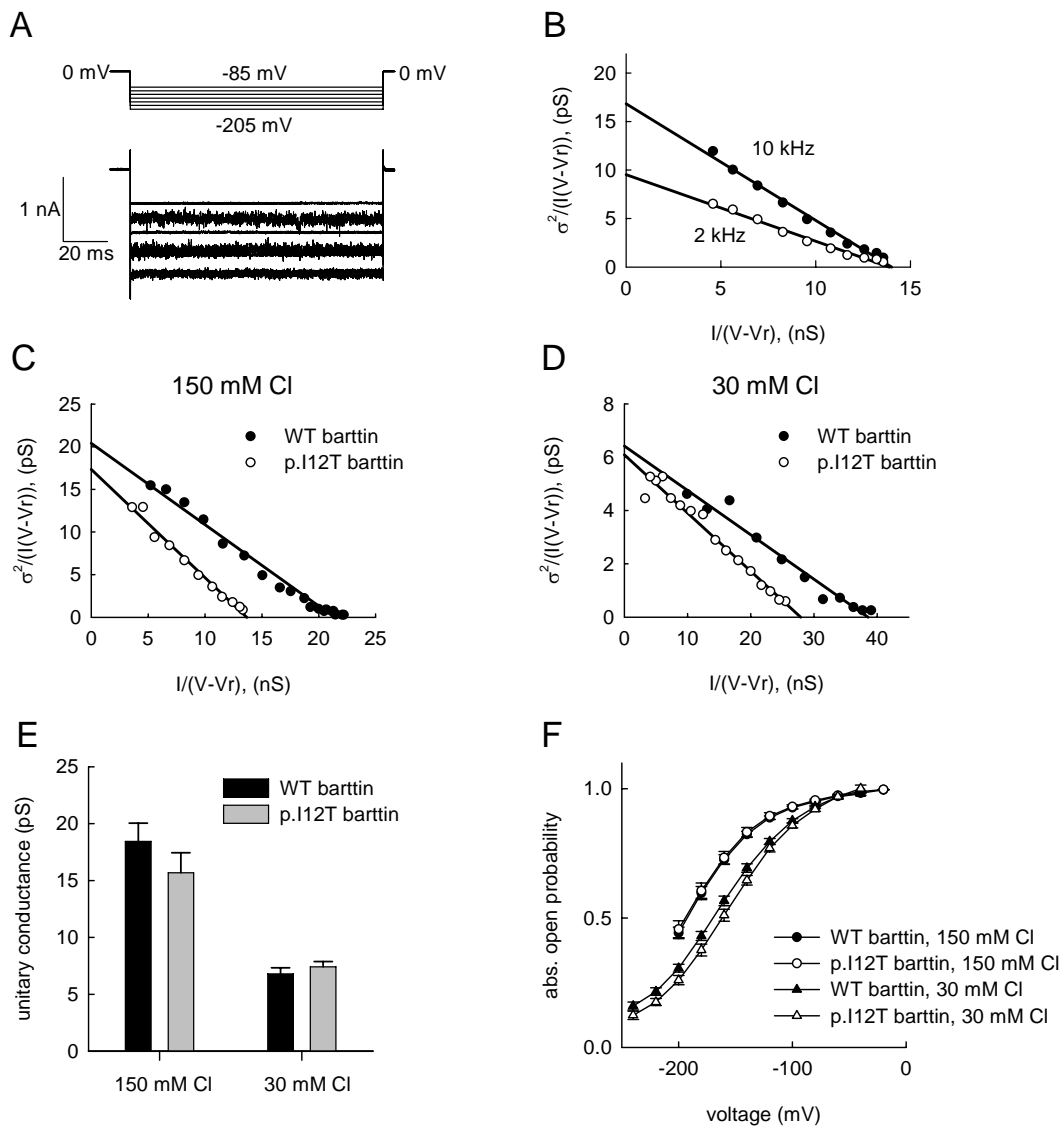

Supplement: mmc1.pdf [file mmc1.pdf]
